# Supplementary material
Source: publisher figshare collection journal article supplement (https://aacr.figshare.com/ndownloader/files/39878726)
Supplement: Supplementary file 1 [file 39878726]

## Sheet: siRNA
Table S3. siRNA used in this study.
siRNA	Vendor	Catalog
CHD1 siRNA-1	Sigma-Aldrich	SASI_Hs02_00331472
CHD1 siRNA-2	Sigma-Aldrich	SASI_Hs01_00203194
CHD1 siRNA-3	Sigma-Aldrich	SASI_Hs01_00203195
PTEN siRNA-1	Sigma-Aldrich	SASI_Hs01_00196478
PTEN siRNA-2	Sigma-Aldrich	SASI_Hs01_00196480
siRNA universal negative control	Sigma-Aldrich	SIC001

## Sheet: sgRNA
Table S3. sgRNA used in this study.
sgRNA construct	Vendor	Catalog	sequence
AURKA sgRNA CRISPR	Applied Biological Materials	K0159305	5′-GCTTGTCTCCAGTCACAAGC-3′
TPX2 sgRNA CRISPR	Applied Biological Materials	474211110595	5′-CATCAACTTACAGGAGATGA-3′
KPNA2 sgRNA CRISPR	Applied Biological Materials	259001110595	#1: 5′-AATGAGGCGTCGCAGAATAG-3′
			#2: 5′-CGGATTATGTTGTCTATGGG-3′
CRISPR Scrambled sgRNA	Applied Biological Materials	K010	5′-GCACTCACATCGCTACATCA-3′
pLentiCRISPR v2-sgCHD1 #1	was generated in this study		5′-CACCGTCAGCTCCATCAACTTTCGG-3′
pLentiCRISPR v2-sgCHD1 #2	was generated in this study		5′-CACCGGACGCATCATCAGACCAAA-3′
pX330-Cherry-sgCHD1	was generated in our previous study(28)		5′-CACCGTCAGCTCCATCAACTTTCGG-3′

## Sheet: plasmid
Table S3. plasmids used in this study.
plasmid	Vendor	Catalog
pHage-EF1a-V5-IRES-EGFP	was generated in our previous study(28)
pHage-EF1a-CHD1-V5-IRES-EGFP	was generated in our previous study(28)
Precision LentiORF KPNA2	Horizon	OHS5897-202617908
Precision LentiORF AURKA	Horizon	OHS5897-202618339
pLentiCRISPR v2	Addgene	98290
psPAX2	Addgene	12260
pMD2.G	Addgene	12259

## Sheet: KPNA2-promoter region
Table S3.the sequence of KPNA2-promoter region used in this study.
KPNA2-promoter region with putative CHD1-binding sites
5'-GGAACCTAGCTAGCGCCGCTCCCTCATCTCGCGATGCCATCCTCTTTTTTTTTTTTTCTTTCCCCCCTCC CACTCGCCCCCAAGCCCTATGACTCCCTCCCCTCCCAACGTGTTTTTCAAATCCACCAATGGGCACACA GCTTAGGCTCGAACCAGCCAATCGGAATGCGGAGTCACCGGGAAATTTAAATCGCGCCGGCCGGCTG CACGAGCCACACGGTCTTTGAGCTGAGTCGAGGTGGACCCTTTGAACGCAGTCGCCCTACAGCCGCT GATTCCCCCCGCATCGCCTCCCGTGGAAGCCCAGGCCCGCTTCGCAGGTACAGACTCAGGCGGCGGC CCGGCCCGAGCGCTAACGGCTTGCCCGTGGGCGGCGTTCGCCTTTTGGGTT…
